# Supplementary material for: Iron Overload and the Risk of Diabetes in the General Population: Results of the Chinese Health and Nutrition Survey Cohort Study
Source: PubMed Central journal article supplement — Diabetes Metab J. 2022 Mar 7;46(2):307–18. doi: 10.4093/dmj.2020.0287 (PMC8987685; doi:10.4093/dmj.2020.0287), 2022-03-07
Supplement: dmj-2020-0287-suppl1.pdf [file dmj-2020-0287-suppl1.pdf]

**Supplementary Table 1.** Comparison of the characteristics of the participants included in the analytic sample and those excluded from the analyses

| Characteristic               | Excluded               | Included               | P value | Test     | SMD   |
|------------------------------|------------------------|------------------------|---------|----------|-------|
| Number                       | 2,828                  | 5,779                  |         |          |       |
| <b>Sex</b>                   |                        |                        |         |          |       |
| Men                          | 1,376 (48.7)           | 2,648 (45.8)           | 0.014   | Exact    | 0.057 |
| Women                        | 1,452 (51.3)           | 3,131 (54.2)           |         |          |       |
| Age, yr                      | 49.94±15.79            | 50.94±14.34            | 0.003   | Norm     | 0.066 |
| <b>Physical examinations</b> |                        |                        |         |          |       |
| Height, cm                   | 162.24±8.55            | 160.46±8.53            | <0.001  | Norm     | 0.209 |
| Weight, kg                   | 62.20±11.58            | 60.28±11.14            | <0.001  | Norm     | 0.169 |
| BMI, kg/m <sup>2</sup>       | 23.56±3.58             | 23.33±3.43             | 0.006   | Norm     | 0.064 |
| Systolic pressure, mm Hg     | 126.85±20.09           | 124.51±18.73           | <0.001  | Norm     | 0.120 |
| Diastolic pressure, mm Hg    | 80.38±11.41            | 80.28±11.11            | 0.754   | Norm     | 0.009 |
| <b>Biological</b>            |                        |                        |         |          |       |
| Glucose, mmol/L              | 5.10 (4.67–5.72)       | 5.12 (4.73–5.59)       | 0.272   | Non-norm | 0.206 |
| HbA1c, mmol/L                | 5.50 (5.20–5.90)       | 5.50 (5.20–5.80)       | <0.001  | Non-norm | 0.248 |
| INS, µU/mL                   | 10.51 (7.40–16.00)     | 10.39 (7.30–14.91)     | 0.051   | Non-norm | 0.052 |
| Hemoglobin, g/L              | 141.00 (129.00–153.00) | 140.00 (128.00–154.00) | 0.987   | Non-norm | 0.021 |
| HS-CRP, mg/L                 | 1.00 (1.00–3.00)       | 1.00 (0.00–2.00)       | <0.001  | Non-norm | 0.050 |
| FET, ng/mL                   | 82.08 (43.84–145.64)   | 78.98 (39.19–147.35)   | 0.047   | Non-norm | 0.017 |
| TRF, mg/gL                   | 280.00 (249.00–318.00) | 283.00 (252.00–319.00) | 0.026   | Non-norm | 0.053 |
| Apo-A, g/L                   | 1.09 (0.93–1.27)       | 1.10 (0.95–1.30)       | <0.001  | Non-norm | 0.074 |
| Apo-B, g/L                   | 0.87 (0.71–1.05)       | 0.89 (0.73–1.08)       | <0.001  | Non-norm | 0.089 |
| LDL-C, mmol/L                | 2.86 (2.29–3.47)       | 2.93 (2.36–3.57)       | <0.001  | Non-norm | 0.095 |
| HDL-C, mmol/L                | 1.34 (1.12–1.60)       | 1.40 (1.18–1.65)       | <0.001  | Non-norm | 0.101 |
| LP-A, mg/dL                  | 80.00 (40.00–168.00)   | 78.00 (40.00–169.50)   | 0.826   | Non-norm | 0.008 |
| TG, mmol/L                   | 1.29 (0.87–2.08)       | 1.25 (0.85–1.92)       | 0.003   | Non-norm | 0.094 |
| TC, mmol/L                   | 4.73 (4.11–5.43)       | 4.80 (4.20–5.49)       | <0.001  | Non-norm | 0.076 |
| ALB, g/L                     | 47.40 (45.30–49.60)    | 47.20 (45.15–49.40)    | 0.075   | Non-norm | 0.016 |
| ALT, U/L                     | 18.00 (13.00–27.00)    | 18.00 (13.00–26.00)    | 0.449   | Non-norm | 0.023 |
| TP, g/L                      | 76.60 (73.30–79.90)    | 77.30 (73.90–80.70)    | <0.001  | Non-norm | 0.153 |
| <b>Diet</b>                  |                        |                        |         |          |       |
| Calorie, kcal                | 2,080.49±664.94        | 2,162.22±671.04        | <0.001  | Norm     | 0.122 |
| Carbohydrate, g              | 283.79±99.08           | 299.60±103.35          | <0.001  | Norm     | 0.156 |
| Fat, g                       | 74.82±44.66            | 74.93±39.43            | 0.909   | Norm     | 0.003 |
| Protein, g                   | 63.95±21.80            | 66.83±23.43            | <0.001  | Norm     | 0.128 |
| <b>Behavioral</b>            |                        |                        |         |          |       |
| <b>Smoke</b>                 |                        |                        |         |          |       |
| No                           | 1,920 (68.6)           | 3,998 (69.2)           | 0.567   | Exact    | 0.013 |
| Yes                          | 880 (31.4)             | 1,781 (30.8)           |         |          |       |
| <b>Alcohol</b>               |                        |                        |         |          |       |
| No                           | 1,896 (67.7)           | 3,868 (66.9)           | 0.477   | Exact    | 0.017 |
| Yes                          | 904 (32.3)             | 1,911 (33.1)           |         |          |       |

Values are presented as number (%), mean ± standard deviation, or median (interquartile range).

SMD, standard mean difference; BMI, body mass index; HbA1c, glycosylated hemoglobin; INS, insulin; HS-CRP, high-sensitivity C-reactive protein; FET, ferritin; TRF, transferrin; Apo, apolipoprotein; LDL-C, low-density lipoprotein cholesterol; HDL-C, high-density lipoprotein cholesterol; LP-A, lipoprotein (a); TG, triglyceride; TC, total cholesterol; ALB, albumin; ALT, alanine aminotransferase; TP, total protein.
