# Supplementary material for: Iron Overload and the Risk of Diabetes in the General Population: Results of the Chinese Health and Nutrition Survey Cohort Study
Source: PubMed Central journal article supplement — Diabetes Metab J. 2022 Mar 7;46(2):307–18. doi: 10.4093/dmj.2020.0287 (PMC8987685; doi:10.4093/dmj.2020.0287), 2022-03-07
Supplement: dmj-2020-0287-suppl2.pdf [file dmj-2020-0287-suppl2.pdf]

Supplementary Table 2. Results of the causal mediation analysis

| CMA                       | ACME (95% CI)                               |                                             | ADE (95% CI)                                |                                             | Total effects (95% CI)                      |                                             | Proportion mediated (95% CI)               |                                            | Average                                    |
|---------------------------|---------------------------------------------|---------------------------------------------|---------------------------------------------|---------------------------------------------|---------------------------------------------|---------------------------------------------|--------------------------------------------|--------------------------------------------|--------------------------------------------|
|                           | Control                                     | Treated                                     | Control                                     | Treated                                     | Average                                     | Control                                     | Treated                                    |                                            |                                            |
| CMA for IO, ALT, and IR   |                                             |                                             |                                             |                                             |                                             |                                             |                                            |                                            |                                            |
| Women                     | 0.0463<br>(0.0321 to 0.06) <sup>c</sup>     | 0.0472<br>(0.0330 to 0.06) <sup>c</sup>     | 0.0468<br>(0.0325 to 0.06) <sup>c</sup>     | 0.0537<br>(-0.0137 to 0.12)                 | 0.0532<br>(-0.0135 to 0.12)                 | 0.1<br>(0.0329 to 0.17) <sup>b</sup>        | 0.4633<br>(0.2523 to 1.36) <sup>b</sup>    | 0.474<br>(0.2590 to 1.35) <sup>b</sup>     | 0.4687<br>(0.2552 to 1.36) <sup>b</sup>    |
| Men                       | 0.04195<br>(0.03070 to 0.06) <sup>c</sup>   | 0.04344<br>(0.03218 to 0.06) <sup>c</sup>   | 0.04269<br>(0.03140 to 0.06) <sup>c</sup>   | 0.05261<br>(0.00450 to 0.10) <sup>a</sup>   | 0.05186<br>(0.00442 to 0.10) <sup>a</sup>   | 0.09456<br>(0.04551 to 0.14) <sup>c</sup>   | 0.44431<br>(0.26165 to 0.91) <sup>c</sup>  | 0.46131<br>(0.28107 to 0.91) <sup>c</sup>  | 0.45281<br>(0.27134 to 0.91) <sup>c</sup>  |
| CMA for IO, Apo-B, and IR |                                             |                                             |                                             |                                             |                                             |                                             |                                            |                                            |                                            |
| Women                     | 0.02434<br>(0.01228 to 0.04) <sup>c</sup>   | 0.02505<br>(0.01259 to 0.04) <sup>c</sup>   | 0.0247<br>(0.01244 to 0.04) <sup>c</sup>    | 0.07568<br>(0.00643 to 0.15) <sup>a</sup>   | 0.07603<br>(0.00646 to 0.15) <sup>a</sup>   | 0.10073<br>(0.03165 to 0.17) <sup>b</sup>   | 0.23962<br>(0.10817 to 0.76) <sup>b</sup>  | 0.2476<br>(0.11251 to 0.76) <sup>b</sup>   | 0.24361<br>(0.11025 to 0.76) <sup>b</sup>  |
| Men                       | 0.0212<br>(0.0127 to 0.03) <sup>c</sup>     | 0.0223<br>(0.0137 to 0.03) <sup>c</sup>     | 0.0218<br>(0.0132 to 0.03) <sup>c</sup>     | 0.0722<br>(0.0226 to 0.12) <sup>b</sup>     | 0.0728<br>(0.0228 to 0.12) <sup>b</sup>     | 0.0946<br>(0.0448 to 0.14) <sup>b</sup>     | 0.2204<br>(0.1163 to 0.47) <sup>b</sup>    | 0.2333<br>(0.1241 to 0.49) <sup>b</sup>    | 0.2268<br>(0.1200 to 0.48) <sup>b</sup>    |
| CMA for IO, TG, and Apo-B |                                             |                                             |                                             |                                             |                                             |                                             |                                            |                                            |                                            |
| Women                     | 0.02907<br>(0.02114 to 0.04) <sup>c</sup>   | 0.02907<br>(0.02114 to 0.04) <sup>c</sup>   | 0.02907<br>(0.02114 to 0.04) <sup>c</sup>   | 0.0406<br>(-0.00587 to 0.03)                | 0.0406<br>(-0.00587 to 0.03)                | 0.0406<br>(0.02093 to 0.06) <sup>c</sup>    | 0.49084 to 1.27) <sup>c</sup>              | 0.49084 to 1.27) <sup>c</sup>              | 0.72087<br>(0.49084 to 1.27) <sup>c</sup>  |
| Men                       | 0.031608<br>(0.025691 to 0.04) <sup>c</sup> | 0.031608<br>(0.025691 to 0.04) <sup>c</sup> | 0.031608<br>(0.025691 to 0.04) <sup>c</sup> | 0.045314<br>(0.000628 to 0.03) <sup>a</sup> | 0.045314<br>(0.000628 to 0.03) <sup>a</sup> | 0.045314<br>(0.032418 to 0.06) <sup>c</sup> | 0.69614<br>(0.520931 to 0.98) <sup>c</sup> | 0.69614<br>(0.520931 to 0.98) <sup>c</sup> | 0.69614<br>(0.520931 to 0.98) <sup>c</sup> |
| CMA for IO, ALT, and TG   |                                             |                                             |                                             |                                             |                                             |                                             |                                            |                                            |                                            |
| Women                     | 0.0782<br>(0.0572 to 0.10) <sup>c</sup>     | 0.0782<br>(0.0572 to 0.10) <sup>c</sup>     | 0.0782<br>(0.0572 to 0.10) <sup>c</sup>     | 0.2992<br>(0.2175 to 0.38) <sup>c</sup>     | 0.221<br>(0.1385 to 0.30) <sup>c</sup>      | 0.2992<br>(0.2175 to 0.38) <sup>c</sup>     | 0.2594<br>(0.1830 to 0.38) <sup>c</sup>    | 0.2594<br>(0.1830 to 0.38) <sup>c</sup>    | 0.2594<br>(0.1830 to 0.38) <sup>c</sup>    |
| Men                       | 0.1008<br>(0.0785 to 0.12) <sup>c</sup>     | 0.1008<br>(0.0785 to 0.12) <sup>c</sup>     | 0.1008<br>(0.0785 to 0.12) <sup>c</sup>     | 0.4161<br>(0.3546 to 0.48) <sup>c</sup>     | 0.3153<br>(0.2546 to 0.38) <sup>c</sup>     | 0.4161<br>(0.3546 to 0.48) <sup>c</sup>     | 0.2412<br>(0.1894 to 0.31) <sup>c</sup>    | 0.2412<br>(0.1894 to 0.31) <sup>c</sup>    | 0.2412<br>(0.1894 to 0.31) <sup>c</sup>    |

CMA, causal mediation analysis; ACME, average causal mediation effect; CI, confidence interval; ADE, average direct effect; IO, iron overload; ALT, alanine aminotransferase; IR, insulin resistance; Apo-B, apolipoprotein B; TG, triglyceride.  
<sup>a</sup>P<0.05, <sup>b</sup>P<0.01, <sup>c</sup>P<0.001.
