# Supplementary material for: Iron Overload and the Risk of Diabetes in the General Population: Results of the Chinese Health and Nutrition Survey Cohort Study
Source: PubMed Central journal article supplement — Diabetes Metab J. 2022 Mar 7;46(2):307–18. doi: 10.4093/dmj.2020.0287 (PMC8987685; doi:10.4093/dmj.2020.0287), 2022-03-07
Supplement: dmj-2020-0287-suppl3.pdf [file dmj-2020-0287-suppl3.pdf]

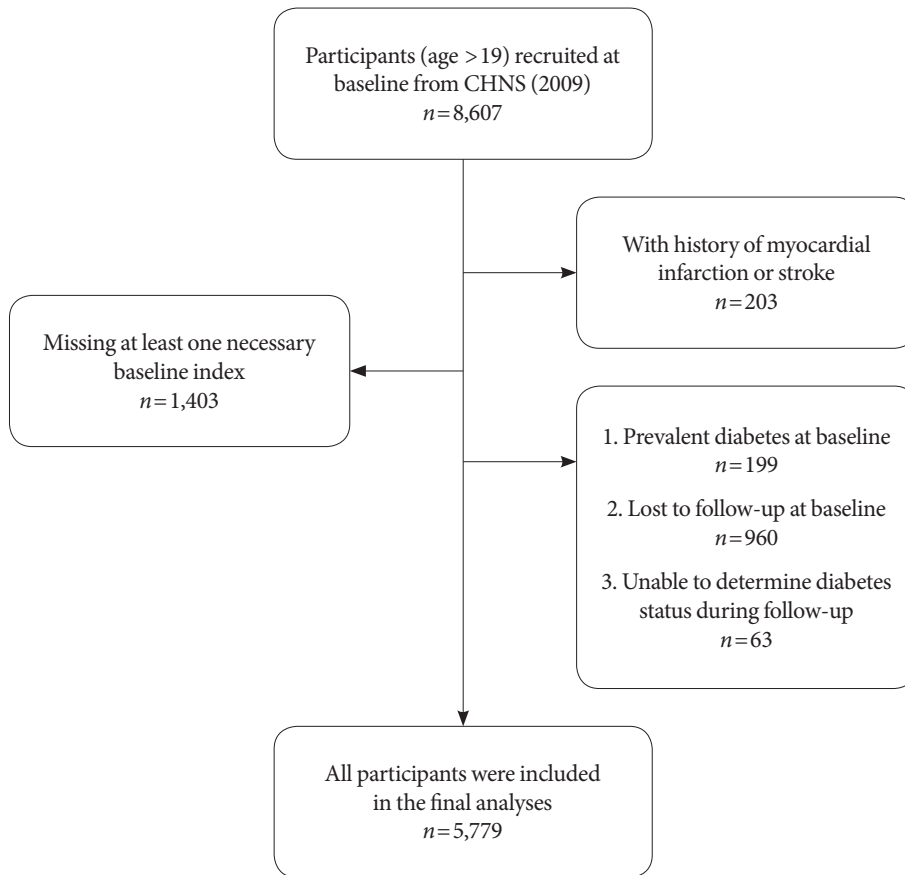

**Supplementary Fig. 1.** Flow chart of participants included in the present study. CHNS, China Health and Nutrition Survey.
