# Supplementary material for: Iron Overload and the Risk of Diabetes in the General Population: Results of the Chinese Health and Nutrition Survey Cohort Study
Source: PubMed Central journal article supplement — Diabetes Metab J. 2022 Mar 7;46(2):307–18. doi: 10.4093/dmj.2020.0287 (PMC8987685; doi:10.4093/dmj.2020.0287), 2022-03-07
Supplement: dmj-2020-0287-suppl4.pdf [file dmj-2020-0287-suppl4.pdf]

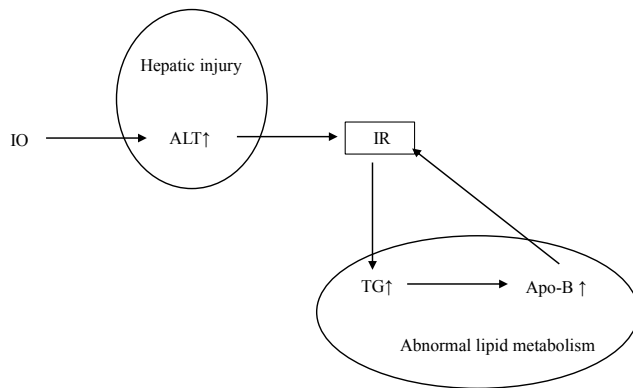

**Supplementary Fig. 2.** Potential mechanism of insulin resistance (IR) induced by iron overload (IO). The ↑ indicates the increase of the index, while the remaining arrows indicate the facilitation. ALT, alanine aminotransferase; TG, triglyceride; Apo-B, apolipoprotein B.
